# Supplementary material
Source: PubMed Central journal article supplement (PMC8639807)
Supplement: NIHMS1745781-supplement-1.pdf [file NIHMS1745781-supplement-1.pdf]

Supplemental Materials for

Genetic and Environmental Influences on Executive Functions and Intelligence in Middle  
Childhood

Samantha M. Freis<sup>1,2</sup>, Claire L. Morrison<sup>1,2</sup>, Jeffrey M. Lessem<sup>1</sup>, John K. Hewitt<sup>1,2</sup>, & Naomi P.  
Friedman<sup>1,2</sup>

University of Colorado Boulder

<sup>1</sup>Institute for Behavioral Genetics, University of Colorado Boulder.

<sup>2</sup>Department of Psychology and Neuroscience, University of Colorado Boulder.

**Supplemental Table 1***Descriptive Statistics for Cognitive Tasks Before Screening*

| Measure   | <i>n</i> | <i>M</i> | <i>SD</i> | Min    | Max    | Range   | Skew  | Kurtosis |
|-----------|----------|----------|-----------|--------|--------|---------|-------|----------|
| Flanker   | 11712    | 94       | 9.14      | 51     | 116    | 65      | -1    | 1.49     |
| List      | 11669    | 96.64    | 12.09     | 36     | 136    | 100     | -0.54 | 0.87     |
| Card      | 11713    | 92.52    | 9.51      | 50     | 120    | 70      | -0.82 | 2.04     |
| Picture   | 11706    | 102.81   | 12.07     | 76     | 136    | 60      | 0.25  | -0.4     |
| NBack2    | 9468     | 0.71     | 0.17      | 0      | 1      | 1       | -1.04 | 1.49     |
| StroopRT  | 4848     | 75.55    | 64.1      | -260.9 | 413.36 | 674.26  | 0.2   | 0.82     |
| StroopACC | 4849     | -0.04    | 0.06      | -1     | 0.25   | 1.25    | -3.3  | 33.01    |
| SST       | 9598     | 299.69   | 85.07     | -692   | 702.69 | 1394.69 | -1.23 | 9.5      |
| PI        | 11597    | -0.2     | 1.99      | -9     | 7      | 16      | -0.02 | 0.27     |
| RI        | 11644    | -1.55    | 2.14      | -15    | 14     | 29      | -0.54 | 4.6      |
| MatrixR   | 11620    | 17.9     | 3.84      | 0      | 32     | 32      | -0.4  | 0.8      |
| PicVocab  | 11718    | 84.45    | 8.12      | 29     | 119    | 90      | 0.11  | 0.64     |

*Note.* Descriptive statistics for cognitive tasks before data screening. List = list sort; Card = card sort; Picture = picture sequence; NBack = accuracy on 2-back trials; StroopACC = Accuracy Diff Score = difference in accuracy between incongruent and congruent trials (incongruent trials - congruent trials); StroopRT = RT Diff Score = difference in reaction time (RT) between incongruent and congruent trials (incongruent trials - congruent trials); SST = stop signal RT, calculated by the mean “go” trial RT - the mean stop signal delay; RAVLT = Rey auditory verbal learning task; PI = proactive interference; RI = retroactive interference.; Matrix = matrix reasoning; PicVoc = picture vocabulary.

**Supplemental Table 2***Model Comparison Fit Statistics for Behavioral Genetic Models of Latent Variables*

| <b>Model</b>        | $\chi^2$ | <u>Model Fit</u> |          |       | <u>Model fit vs. full Model</u> |                |           |          |
|---------------------|----------|------------------|----------|-------|---------------------------------|----------------|-----------|----------|
|                     |          | <i>df</i>        | <i>p</i> | RMSEA | CFI                             | $\Delta\chi^2$ | <i>df</i> | <i>p</i> |
| Full ACE: EF & UPD  | 185.75   | 100              | < .001   | .048  | .872                            |                |           |          |
| Without cEF         | 185.80   | 101              | < .001   | .047  | .874                            | 0.05           | 1         | .823     |
| Without eEF         | 197.45   | 101              | < .001   | .050  | .860                            | 11.70          | 1         | .001     |
| Without aEF         | 196.62   | 101              | < .001   | .050  | .858                            | 10.87          | 1         | .001     |
| Without aEF & cEF   | 250.77   | 102              | < .001   | .062  | .779                            | 65.02          | 2         | < .001   |
| Without cUPD        | 185.99   | 101              | < .001   | .047  | .874                            | 0.24           | 1         | .625     |
| Without eUPD        | 185.75   | 101              | < .001   | .047  | .874                            | 0.00           | 1         | 1.00     |
| Without aUPD        | 185.99   | 101              | < .001   | .047  | .874                            | 0.24           | 1         | .626     |
| Without aUPD & cUPD | 214.63   | 102              | < .001   | .054  | .832                            | 28.88          | 1         | < .001   |
| Full ACE: IQ        | 15.06    | 17               | .591     | .000  | 1.00                            |                |           |          |
| Without cIQ         | 20.68    | 18               | .296     | .020  | .994                            | 5.62           | 1         | .018     |
| Without eIQ         | 15.07    | 18               | .657     | .000  | 1.00                            | 0.01           | 1         | .906     |
| Without aIQ         | 21.74    | 18               | .244     | .024  | .991                            | 6.68           | 1         | .010     |
| Without aIQ & cIQ   | 133.25   | 19               | < .001   | .127  | .738                            | 118.19         | 2         | < .001   |
| Genetic Cholesky    | 283.44   | 190              | < .001   | .036  | .930                            |                |           |          |
| Without aEF to IQ   | 298.61   | 191              | < .001   | .040  | .920                            | 15.18          | 1         | < .001   |
| Without aUPD to IQ  | 284.82   | 191              | < .001   | .036  | .933                            | 1.38           | 1         | .240     |
| Without cEF to IQ   | 284.85   | 191              | < .001   | .036  | .933                            | 1.42           | 1         | .234     |
| Without cUPD to IQ  | 285.67   | 191              | < .001   | .036  | .932                            | 2.23           | 1         | .135     |
| Without eEF to IQ   | 283.45   | 191              | < .001   | .036  | .930                            | 0.01           | 1         | .916     |
| Without a&cEF to IQ | 383.23   | 192              | < .001   | .052  | .861                            | 99.79          | 2         | < .001   |

*Note.* A=additive genetic influences, C=shared environmental influences, E=nonshared

environmental influences. EF=Common EF, UPD=Updating-Specific, and IQ=latent IQ.

Indented models are nested within preceding non-indented models,  $\Delta\chi^2 p < .05$  indicates that a significant reduction in model fit and that a significant parameter was dropped from the model.

The genetic Cholesky decomposition was used to derive the genetic and environmental correlations of the EF and IQ latent variables. It did not contain a cross path from eUPD to eIQ because the E variance component for Updating-Specific EF was estimated at 0 in the EF model without IQ.

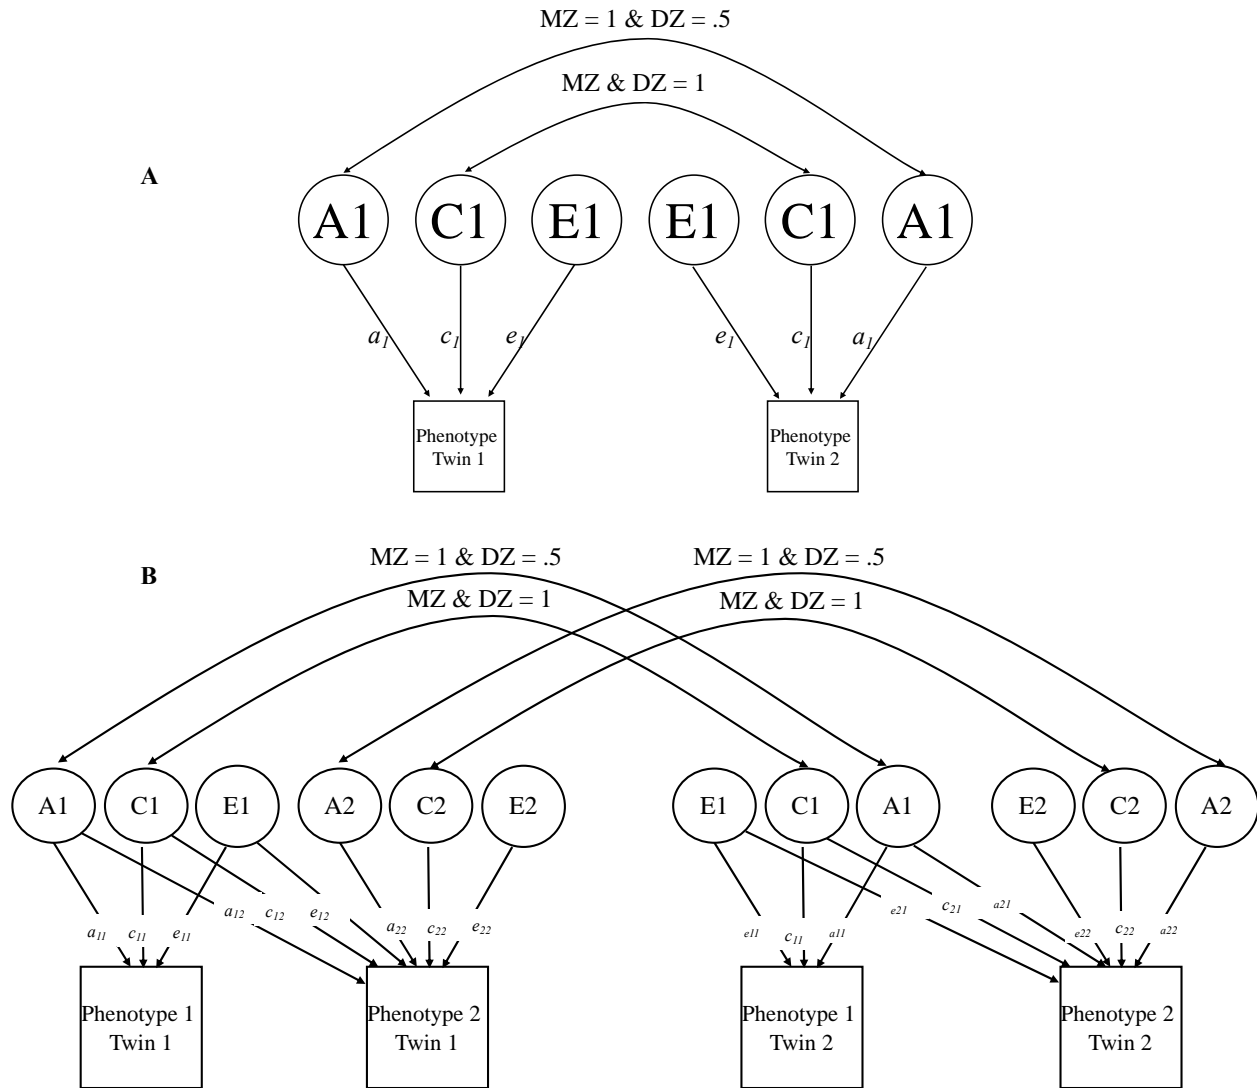

**Supplemental Figure 1.** Path diagrams for the univariate twin model (panel A) and the bivariate Cholesky decomposition (panel B). Each phenotype's variance is decomposed into three components: additive genetic (A), shared environmental (C, those that lead siblings to be more similar), and nonshared environmental (E, those that lead siblings to be uncorrelated). The correlations between the A variance components for twin 1 and twin 2 are fixed at 1 for MZ twins and .5 for DZ twins, reflecting the average proportion of shared segregating DNA for MZ and DZ twins. Because both MZ and DZ twins are reared together, the C variance components for twin 1 and twin 2 are correlated at 1 for both MZ and DZ twin pairs. Finally, the E variance

components are not correlated, as they represent environmental influences unique to each twin.

The lower-case italicized letters (*a*, *c*, *e*) are path coefficients. Squaring these estimates indicates the variance explained in the phenotype by A, C, or E, respectively. The use of the same subscripts indicates that the parameters are constrained to be equal across twin 1 and twin 2.

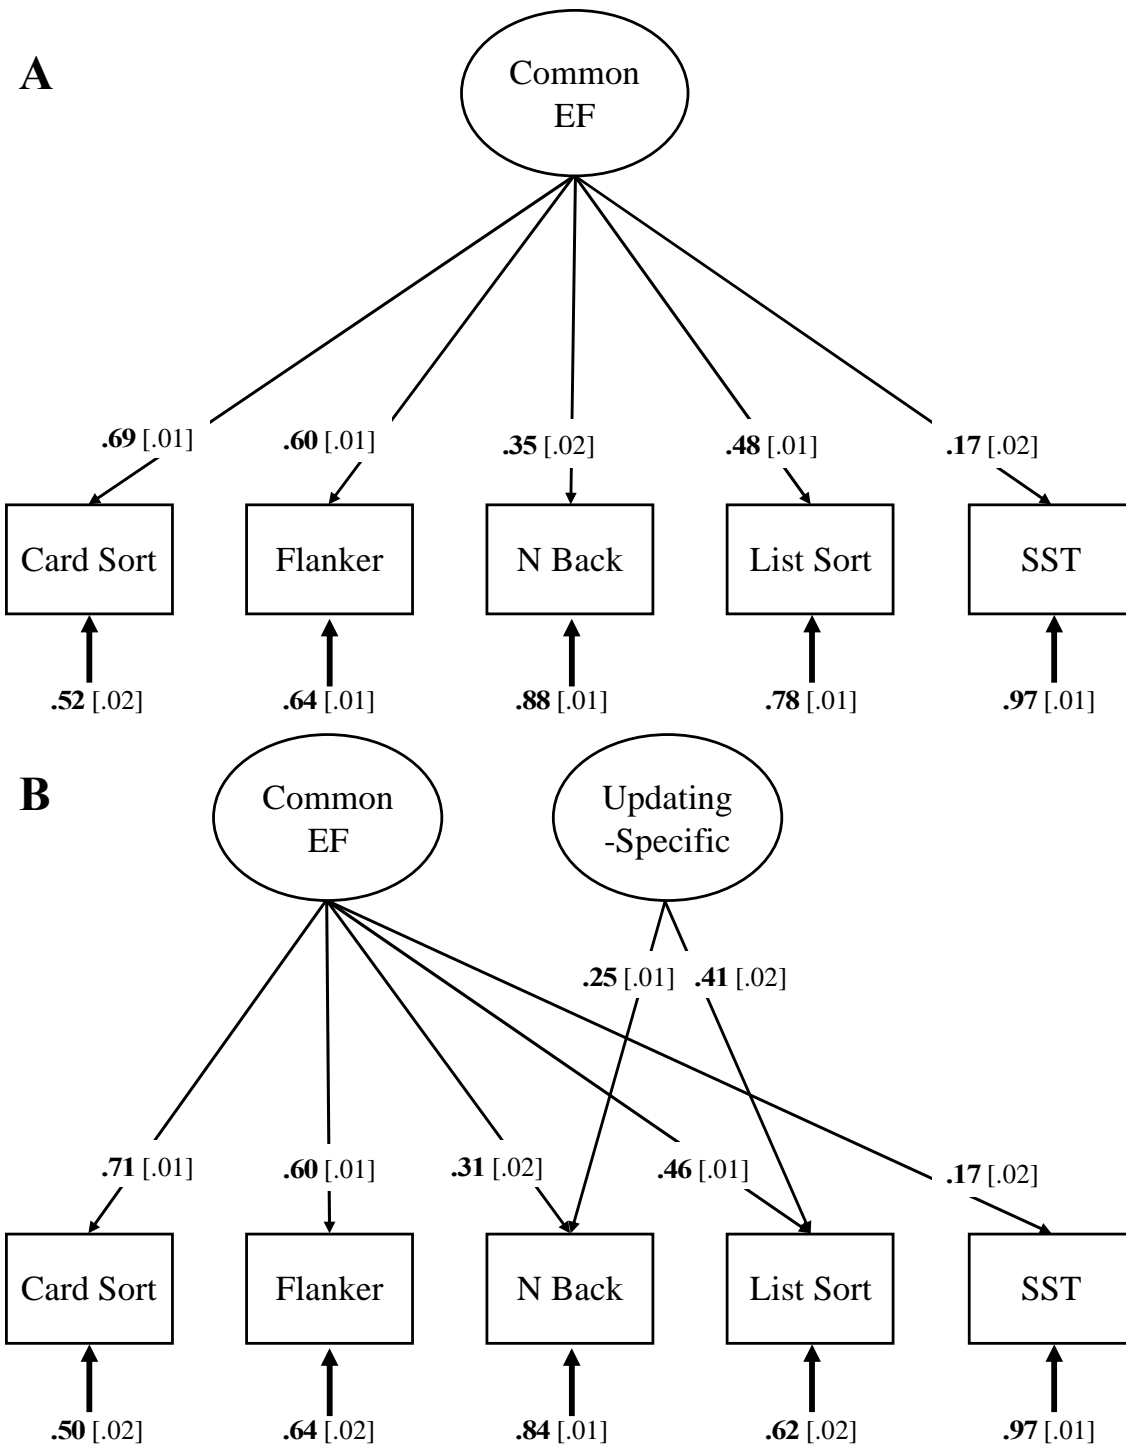

**Supplemental Figure 2.** Phenotypic factor models of executive functions (EFs). Ellipses indicate latent variables; rectangles indicate observed variables. Numbers on single-headed arrows indicate standardized factor loadings [standard errors]. Numbers at the ends of arrows are

residual variances. Double headed arrows between latent factors indicate correlations. Solid lines and boldface type indicate  $p < .05$ . Panel A depicts the path diagram of a unitary factor model of Common EF,  $\chi^2(5) = 123.52, p < .001, RMSEA = .045, CFI = .971$ . Panel B depicts the path diagram of the phenotypic factor model of Common EF and Updating-Specific ability,  $\chi^2(4) = 43.48, p < .001, RMSEA = .029, CFI = .990$ .

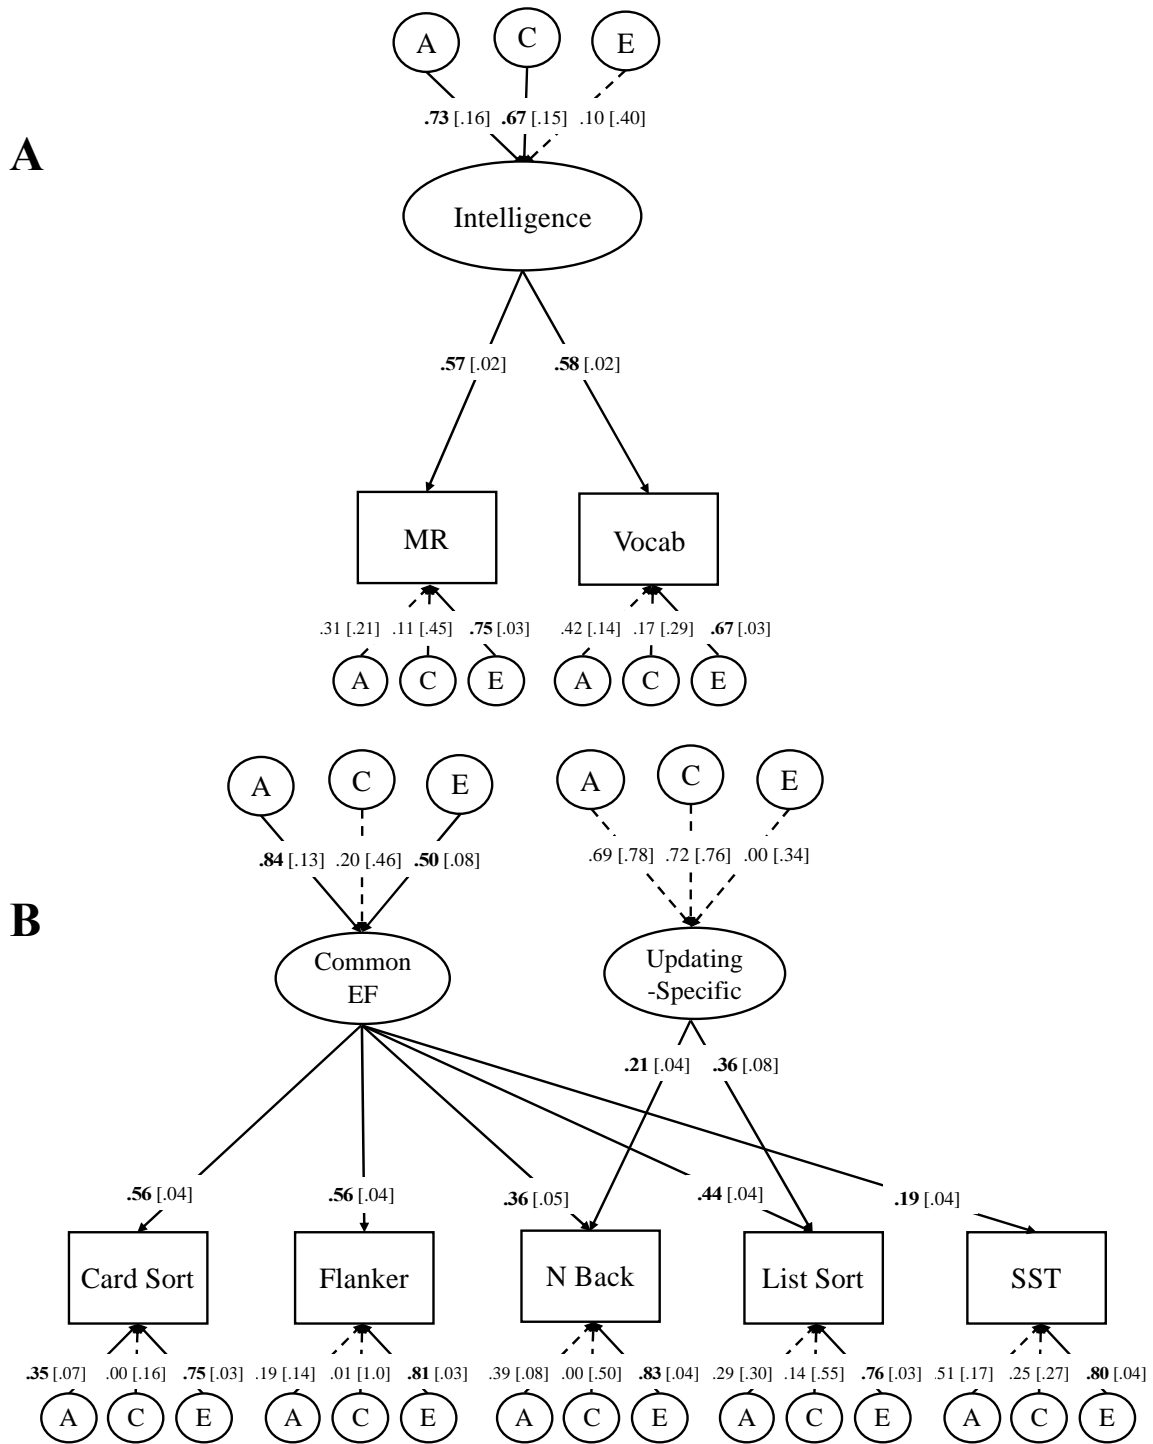

**Supplemental Figure 3.** Twin models of latent Common Executive Functioning (EF) and Updating-Specific variables,  $\chi^2(100) = 185.75, p < .001, RMSEA = .048, CFI = .872$  (panel A) and intelligence (IQ),  $\chi^2(17) = 15.06, p = .591, RMSEA = .000, CFI = 1.00$  (panel B). A



indicates additive genetic influences, C indicates shared environmental influences, and E indicates nonshared environmental influences. Solid lines and boldface type indicate  $p < .05$ ; dashed lines indicate  $p > .05$ , determined with chi-square difference tests for variance components.
